# Supplementary material for: Assessment of DDAH1 and DDAH2 Contributions to Psychiatric Disorders via In Silico Methods
Source: MDPI journal article supplement (doi:10.3390/ijms231911902), 2022-10-07
Supplement: s1 [file s1]

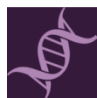

# Assessment of DDAH1 and DDAH2 Contribution in Psychiatric Disorders via In Silico Methods

Alena A. Kozlova <sup>1,†</sup>, Anastasia N. Vaganova <sup>2,†</sup>, Roman N. Rodionov <sup>3</sup>, Raul R. Gainetdinov <sup>2</sup> and Nadine Bernhardt <sup>1,\*</sup>

<sup>1</sup> Department of Psychiatry and Psychotherapy, University Hospital Carl Gustav Carus, Technische Universität Dresden, 01307 Dresden, Germany

<sup>2</sup> Institute of Translational Biomedicine, Saint-Petersburg State University, 199034 Saint-Petersburg, Russia

<sup>3</sup> Department of Internal Medicine III, Technische Universität Dresden, 01307 Dresden, Germany

\* Correspondence: Nadine.Bernhardt@uniklinikum-dresden.de

† These authors contributed equally to this work

## S1. DDAH1 cluster

### BioGRID

ADA, AFTPH, APEX1, APOOL, ARCN1, ATP5A1, BOLA3, CALM1, CATSPER4, CD69, CLIC1, CLIC4, CMPK1, CUL4A, DDAH2, ELAVL1, EPB41L2, FEN1, FGB, FSD1, GLOD4, HDHD3, HINT2, IQCB1, LACE1, LACTB2, LYRM4, MOV10, NDFIP2, NDUFAB1, NENF, NME1-NME2, NXF1, OBSL1, PARK7, PDP1, PGLS, POTEF, PRKAR1B, PSMD10, TMEM173, TRIM25, UCHL1, VCP,

### STRING

ACE, AGXT2, ARG1, ARG2, B3GALT2, BRDT, BROX, C1orf52, COL11A1, CRACR2A, DDAH2, GSTK1, GSTZ1, LYPLA1, LYPLA2, NOS1, NOS3, PADI4, PRMT1, PRMT3, PRRC2A, PRRT1, RAB10, RAB12, RAB13, RAB15, RAB28, RAB40A, RAB40AL, RAB40B, RAB40C, RAB44, RAB8A, RAB8B, RASEF, RXRG, SKIV2L, SLC1A4, SLC1A5, SLC1A6, SLC1A7, VAV3, ZBTB12, ZNHIT6

### MINT

YWHAH

## S2. DDAH2 cluster

### BioGRID

ACTN3, ANXA7, ATP1B1, BID, C21ORF33, CDC73, CDK4, CDKN1A, CLIC4, CLNS1A, DAOA, DDAH1, DDX58, DNAJB11, ENG, ENO1, EPB41L1, EPB41L2, EPB41L3, FANCL, FKBP1B, FN1, GADD45G, GOT1, GPATCH4, HCFC1, HDHD3, HINT1, HINT2, HNRNPH1, HYI, IGFN1, LACTB2, MKNK1, MPST, NDUFAB1, NFKBIA, NOXA1, NSP7AB, OGT, PARK7, PDP1, PIN1, PPA1, PRKAB2, PRNP, PRSS2, RAB11FIP5, RAP1B, RCC1, RPS6KA1, RPS6KA5, SARNP, SCGN, SLC25A35, SMN1, SOX2, STK3, TAF1D, TK1, TNFSF11, TRIM41, TRIP13, TSC22D1, TULP2, VAC14, VCAM1, ZAK

### STRING

ACE, AGPAT1, AGXT2, ARFGAP2, ARFGAP3, ARG1, ARG2, ATF6B, C6orf25, CAPN2, CAT, CDK2, CLIC1, CLNS1A, CRACR2A, CROCC, DDAH1, DOC2A, EPB41L1, EPB41L2, EPB41L3, EXOC7, GCHFR, HNRNPL, KIF5B, MLF2, MPO, NOS1, NOS3, PADI4, PAIP2, PBX2, PGLS, PRMT1, PRMT2, PRMT3, RBKS, RING1, SCGN, SLC1A7, SLC7A4, SNAP23, TOM1L1, TRIP13, UBL7, VEGFB, YRDC,

### MINT

ANXA7, ATP1B1, CDC73, CDK4, CDKN1A, MAP3K20, TAF1D, MKNK1, SMN2, PIN1, STK3, TK1, GADD45G, RPS6KA5, DNAJB11, RAP1B, RCC1, RPS6KA1, TNFSF11, TSC22D1

HPRD

TRIP13

### S3. Gene ontology (GO) enrichment analysis of genes involved in the functional interaction with DDAH1 or DDAH2

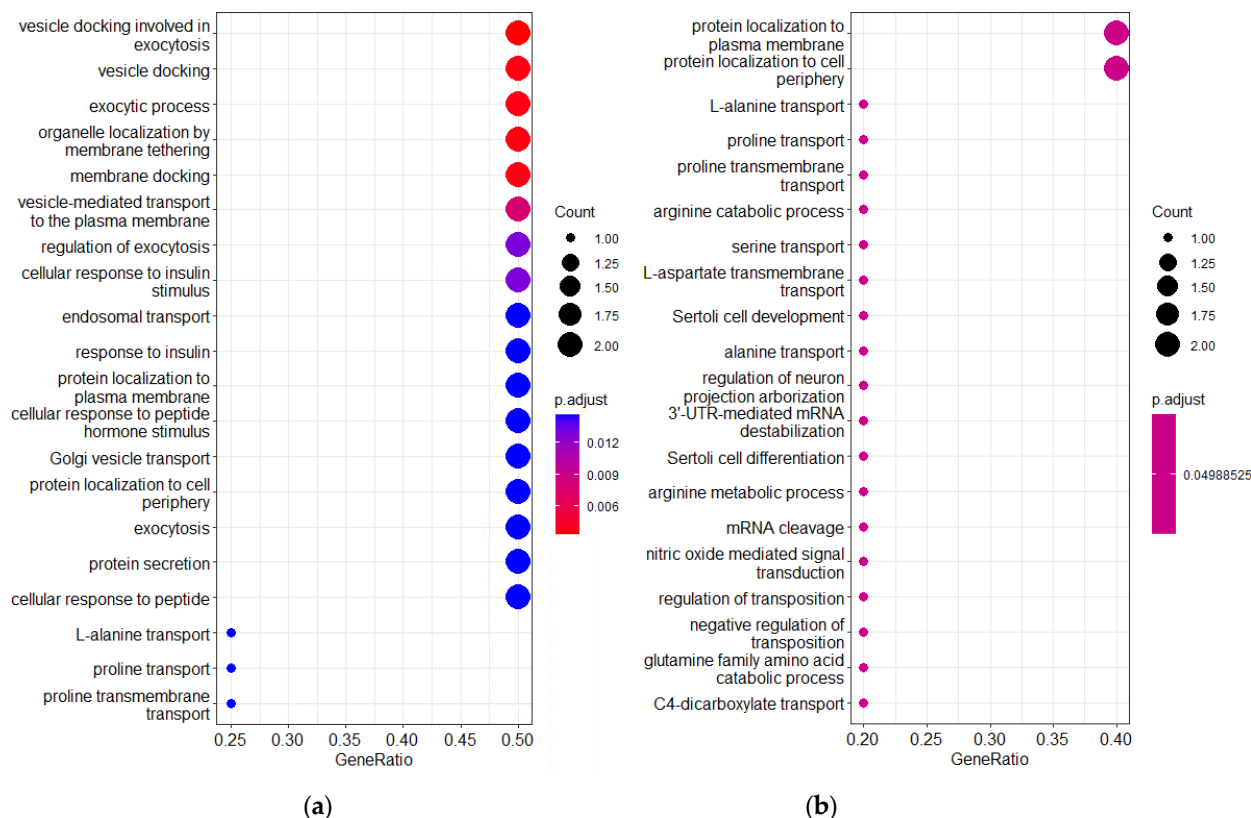

**Figure S1.** GO enrichment analysis of genes involved in the functional interaction with DDAH1 according to the public resources' data which are co-expressed with (a) DDAH1 in control group and (b) DDAH1 in schizophrenic group.

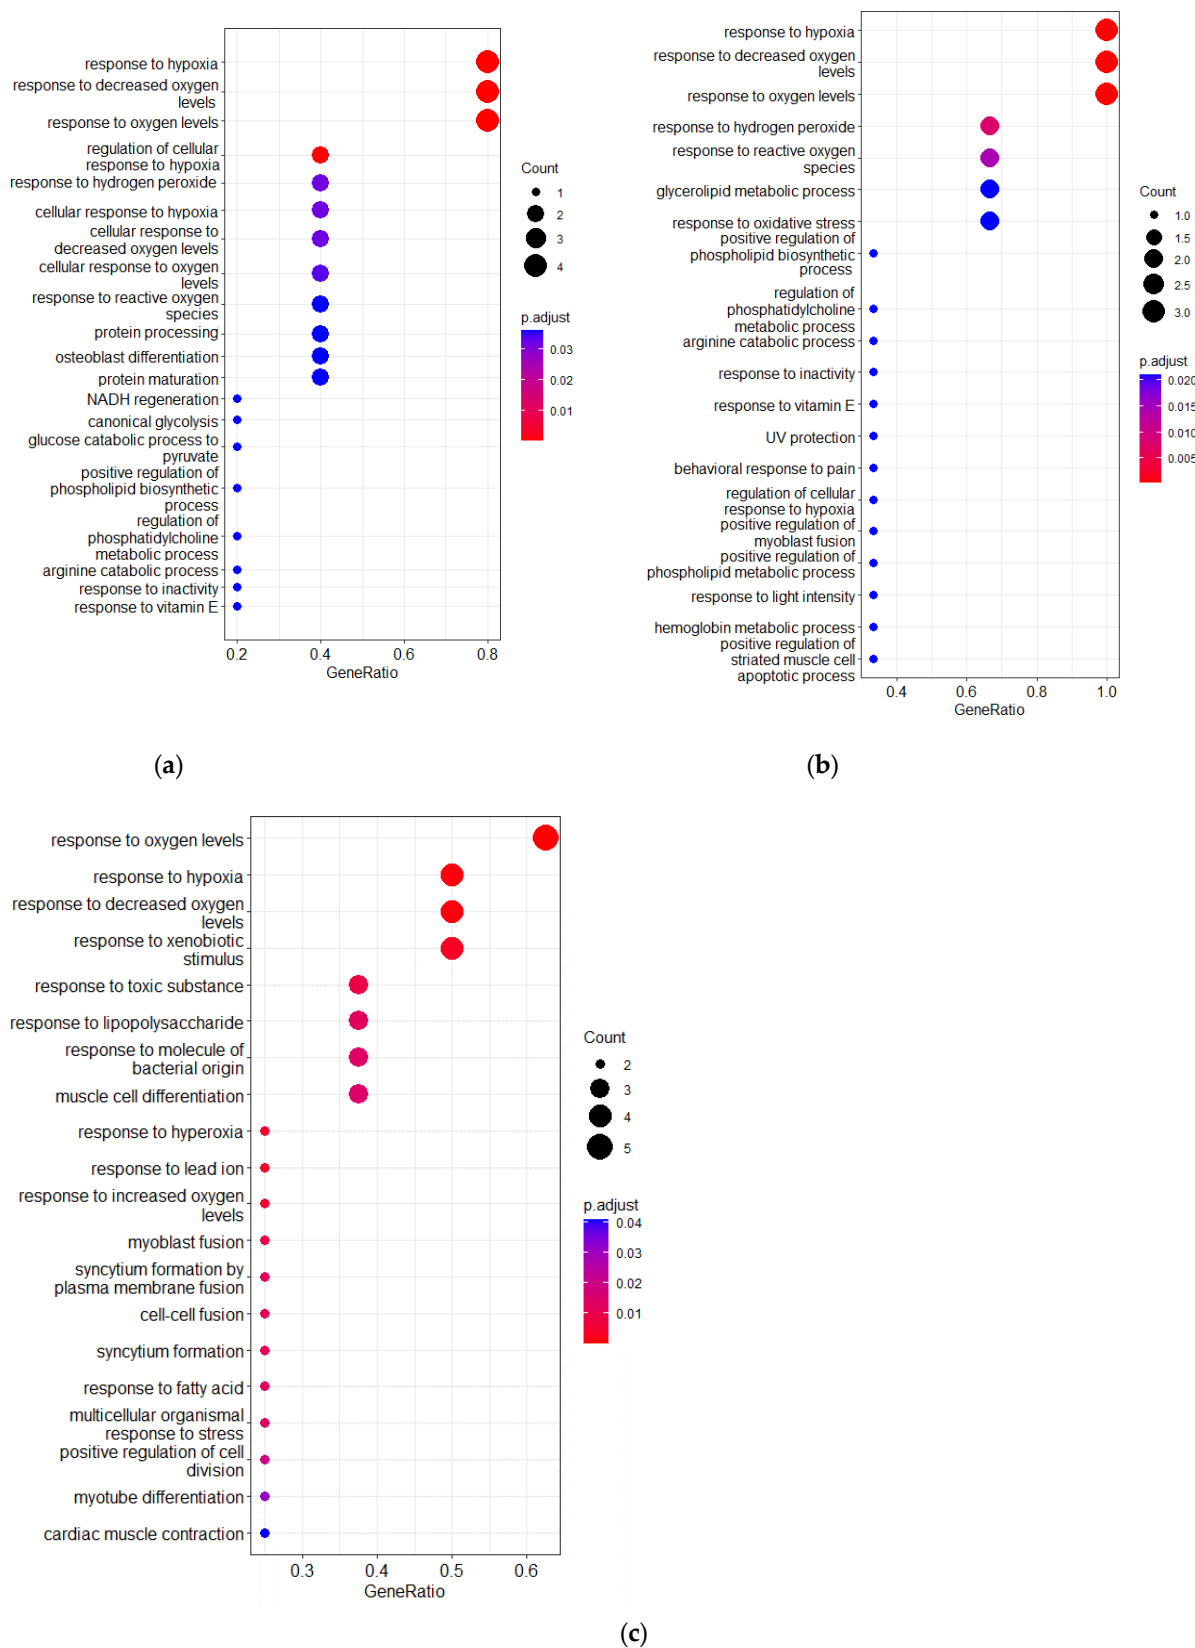

**Figure S2.** GO enrichment analysis of genes involved in the functional interaction with DDAH2 according to the public resources' data which are co-expressed with (a) DDAH2 in control group, (b) DDAH2 in schizophrenic group, (c) DDAH2 in bipolar affective disorder group.

#### S4. Enrichment analysis of promotor motifs in genes co-expressed with DDAH1 or DDAH2

**Table S4.1.** Enriched promoter motifs in genes co-expressed with DDAH1 in the dorsolateral pre- frontal cortex of non-psychiatric control subjects.

| Enriched motif in promoter | TF   | TF family | P val.              | FDR                 | Score               |
|----------------------------|------|-----------|---------------------|---------------------|---------------------|
| CG                         | CGBP | CxxC      | 2.4E <sup>-05</sup> | 1.0E <sup>-02</sup> | 5.0E <sup>+00</sup> |
| CG                         | TET1 | CxxC      | 7.5E <sup>-05</sup> | 1.5E <sup>-02</sup> | 5.0E <sup>+00</sup> |

**Table S4.2.** Enriched promoter motifs in genes co-expressed with DDAH2 in the dorsolateral pre- frontal cortex of non-psychiatric control subjects.

| Enriched motif in promoter | TF   | TF family | P val.              | FDR                 | Score               |
|----------------------------|------|-----------|---------------------|---------------------|---------------------|
| AGGGGGA                    | MZF1 | C2H2 ZF   | 1.7E <sup>-05</sup> | 6.9E <sup>-03</sup> | 3.2E <sup>+01</sup> |

**Table S4.3.** Enriched promoter motifs in genes co-expressed with DDAH2 in the dorsolateral pre- frontal cortex of patients with bipolar disorder.

| Enriched motif in promoter | TF     | TF family        | P val.              | FDR                 | Score               |
|----------------------------|--------|------------------|---------------------|---------------------|---------------------|
| GGGGGTGG                   | ZNF281 | C2H2 ZF          | 2.8E <sup>-09</sup> | 9.0E <sup>-07</sup> | 2.3E <sup>+01</sup> |
| GGGGGGT                    | ZIC5   | C2H2 ZF          | 4.3E <sup>-09</sup> | 9.0E <sup>-07</sup> | 1.6E <sup>+01</sup> |
| CCG                        | DNMT1  | CxxC             | 5.1E <sup>-08</sup> | 7.1E <sup>-06</sup> | 1.1E <sup>+01</sup> |
| CCCCGGGC                   | TFAP2A | AP-2             | 1.2E <sup>-07</sup> | 1.3E <sup>-05</sup> | 1.4E <sup>+01</sup> |
| GCGGGGGCGGGG               | EGR1   | C2H2 ZF          | 3.6E <sup>-07</sup> | 2.6E <sup>-05</sup> | 3.4E <sup>+01</sup> |
| GGAGGAGGAGGGGGAGGAGG       | ZNF263 | C2H2 ZF          | 3.8E <sup>-07</sup> | 2.6E <sup>-05</sup> | 3.4E <sup>+01</sup> |
| GGGGGGGGGCC                | PATZ1  | C2H2 ZF          | 2.5E <sup>-06</sup> | 1.5E <sup>-04</sup> | 2.5E <sup>+01</sup> |
| GGGGGCGGGG                 | SP1    | C2H2 ZF          | 4.0E <sup>-06</sup> | 2.1E <sup>-04</sup> | 2.5E <sup>+01</sup> |
| CCCCGGGC                   | TFAP2C | AP-2             | 7.0E <sup>-06</sup> | 3.2E <sup>-04</sup> | 1.5E <sup>+01</sup> |
| TGACCTCTGACCCC             | NR2C2  | Nuclear receptor | 7.7E <sup>-06</sup> | 3.2E <sup>-04</sup> | 1.9E <sup>+01</sup> |
| GGGGCCCAAGGGGG             | PLAG1  | C2H2 ZF          | 1.0E <sup>-05</sup> | 3.8E <sup>-04</sup> | 2.8E <sup>+01</sup> |
| TGCGGG                     | GCM1   | GCM              | 3.1E <sup>-05</sup> | 1.1E <sup>-03</sup> | 8.0E <sup>+00</sup> |
| GGGGGCGGGGC                | SP2    | C2H2 ZF          | 3.6E <sup>-05</sup> | 1.1E <sup>-03</sup> | 2.7E <sup>+01</sup> |
| GGGG                       | ZNF202 | C2H2 ZF          | 5.4E <sup>-05</sup> | 1.6E <sup>-03</sup> | 7.0E <sup>+00</sup> |
| CG                         | CGBP   | CxxC             | 1.2E <sup>-04</sup> | 3.2E <sup>-03</sup> | 5.0E <sup>+00</sup> |
| GGGCGGGGC                  | KLF5   | C2H2 ZF          | 1.3E <sup>-04</sup> | 3.3E <sup>-03</sup> | 1.8E <sup>+01</sup> |
| CGAGGCGCAGTGATGCGTAGCGGC   | PAX5   | Paired box       | 1.9E <sup>-04</sup> | 4.7E <sup>-03</sup> | 1.6E <sup>+01</sup> |
| TGTCAGGGGGC                | INSM1  | C2H2 ZF          | 2.1E <sup>-04</sup> | 4.8E <sup>-03</sup> | 1.5E <sup>+01</sup> |

|                       |        |         |         |         |         |
|-----------------------|--------|---------|---------|---------|---------|
| GGCGCC                | E2F2   | E2F     | 2.3E-04 | 5.0E-03 | 1.2E+01 |
| GCCTGAGG              | TFAP2E | AP-2    | 2.8E-04 | 5.8E-03 | 1.1E+01 |
| TCCCTGGGGA            | EBF1   | bHLH    | 3.0E-04 | 6.0E-03 | 1.2E+01 |
| GCCTCAGGGCA           | TFAP2A | AP-2    | 5.3E-04 | 9.9E-03 | 1.4E+01 |
| GAGGGGGAA             | MZF1   | C2H2 ZF | 7.2E-04 | 1.2E-02 | 1.2E+01 |
| GGCGCTGTCCGTGGTGCTGAA | REST   | C2H2 ZF | 7.2E-04 | 1.2E-02 | 2.0E+01 |
| GCCCTGGGGC            | TFAP2C | AP-2    | 7.5E-04 | 1.2E-02 | 1.3E+01 |
| GGGGA                 | MZF1   | C2H2 ZF | 8.4E-04 | 1.3E-02 | 9.0E+00 |
| GGGAGT                | EP300  | Unknown | 8.8E-04 | 1.4E-02 | 8.0E+00 |
| ATGCGTGGGCGG          | EGR4   | C2H2 ZF | 1.0E-03 | 1.5E-02 | 1.5E+01 |
| GGGGCGCAGCTGCGCCC     | NHLH1  | bHLH    | 1.2E-03 | 1.7E-02 | 1.6E+01 |
| GGGCGGGAA             | E2F6   | E2F     | 1.2E-03 | 1.7E-02 | 1.3E+01 |

### S5. Disease ontology (DO) terms enrichment analysis of genes co-expressed with DDAH1 or DDAH2

**Table S5.1.** Enriched DO terms in genes co-expressed with DDAH1 in the dorsolateral prefrontal cortex of non-psychiatric control.

| ID           | Description                    | Enrichment score | p-value | p.adjust |
|--------------|--------------------------------|------------------|---------|----------|
| DOID:114     | heart disease                  | 0,4183           | <0,0001 | 0,0002   |
| DOID:1287    | cardiovascular system disease  | 0,3218           | <0,0001 | 0,0008   |
| DOID:0050155 | sensory system disease         | 0,3756           | <0,0001 | 0,0013   |
| DOID:0050828 | artery disease                 | 0,3343           | <0,0001 | 0,0014   |
| DOID:684     | hepatocellular carcinoma       | 0,3207           | <0,0001 | 0,0014   |
| DOID:686     | liver carcinoma                | 0,3207           | <0,0001 | 0,0014   |
| DOID:3908    | non-small cell lung carcinoma  | 0,3885           | <0,0001 | 0,0014   |
| DOID:3571    | liver cancer                   | 0,3183           | 0,0002  | 0,0017   |
| DOID:305     | carcinoma                      | 0,3254           | 0,0002  | 0,0017   |
| DOID:3905    | lung carcinoma                 | 0,3679           | 0,0002  | 0,0017   |
| DOID:10763   | hypertension                   | 0,3699           | 0,0002  | 0,0017   |
| DOID:3856    | male reproductive organ cancer | 0,3644           | 0,0002  | 0,0017   |
| DOID:1749    | squamous cell carcinoma        | 0,3371           | 0,0002  | 0,0017   |

|              |                                 |        |        |        |
|--------------|---------------------------------|--------|--------|--------|
| DOID:2531    | hematologic cancer              | 0,2957 | 0,0003 | 0,0020 |
| DOID:193     | reproductive organ cancer       | 0,3257 | 0,0003 | 0,0020 |
| DOID:5614    | eye disease                     | 0,3669 | 0,0004 | 0,0020 |
| DOID:0050013 | carbohydrate metabolism disease | 0,3458 | 0,0004 | 0,0020 |
| DOID:4194    | glucose metabolism disease      | 0,3458 | 0,0004 | 0,0020 |
| DOID:17      | musculoskeletal system disease  | 0,3029 | 0,0004 | 0,0020 |
| DOID:557     | kidney disease                  | 0,3731 | 0,0004 | 0,0021 |
| DOID:18      | urinary system disease          | 0,3688 | 0,0005 | 0,0023 |
| DOID:178     | vascular disease                | 0,3080 | 0,0005 | 0,0024 |
| DOID:1909    | melanoma                        | 0,3243 | 0,0006 | 0,0024 |
| DOID:0060083 | immune system cancer            | 0,2959 | 0,0006 | 0,0024 |
| DOID:1492    | eye and adnexa disease          | 0,3544 | 0,0007 | 0,0028 |
| DOID:10283   | prostate cancer                 | 0,3572 | 0,0007 | 0,0028 |

|              |                               |        |        |        |
|--------------|-------------------------------|--------|--------|--------|
| DOID:3996    | urinary system cancer         | 0,3430 | 0,0008 | 0,0028 |
| DOID:0080001 | bone disease                  | 0,3252 | 0,0008 | 0,0028 |
| DOID:0014667 | disease of metabolism         | 0,3018 | 0,0010 | 0,0033 |
| DOID:0050615 | respiratory system cancer     | 0,3320 | 0,0014 | 0,0045 |
| DOID:1240    | leukemia                      | 0,2993 | 0,0014 | 0,0045 |
| DOID:0060158 | acquired metabolic disease    | 0,3099 | 0,0015 | 0,0047 |
| DOID:2994    | germ cell cancer              | 0,3591 | 0,0016 | 0,0047 |
| DOID:65      | connective tissue disease     | 0,3012 | 0,0017 | 0,0049 |
| DOID:1324    | lung cancer                   | 0,3296 | 0,0021 | 0,0060 |
| DOID:170     | endocrine gland cancer        | 0,3275 | 0,0024 | 0,0065 |
| DOID:4451    | renal carcinoma               | 0,3434 | 0,0026 | 0,0068 |
| DOID:1037    | lymphoblastic leukemia        | 0,3440 | 0,0027 | 0,0070 |
| DOID:0060100 | musculoskeletal system cancer | 0,3375 | 0,0033 | 0,0079 |
| DOID:9351    | diabetes mellitus             | 0,3257 | 0,0033 | 0,0079 |
| DOID:263     | kidney cancer                 | 0,3364 | 0,0033 | 0,0079 |

|              |                           |        |        |        |
|--------------|---------------------------|--------|--------|--------|
| DOID:0060072 | benign neoplasm           | 0,3220 | 0,0036 | 0,0084 |
| DOID:10155   | intestinal cancer         | 0,3615 | 0,0047 | 0,0106 |
| DOID:4450    | renal cell carcinoma      | 0,3511 | 0,0048 | 0,0106 |
| DOID:3342    | bone inflammation disease | 0,3116 | 0,0051 | 0,0110 |
| DOID:848     | arthritis                 | 0,3139 | 0,0069 | 0,0143 |
| DOID:5672    | large intestine cancer    | 0,3549 | 0,0070 | 0,0143 |
| DOID:9256    | colorectal cancer         | 0,3549 | 0,0070 | 0,0143 |
| DOID:2914    | immune system disease     | 0,2833 | 0,0073 | 0,0146 |
| DOID:219     | colon cancer              | 0,3491 | 0,0080 | 0,0156 |
| DOID:1793    | pancreatic cancer         | 0,3482 | 0,0084 | 0,0160 |
| DOID:201     | connective tissue cancer  | 0,3211 | 0,0085 | 0,0160 |
| DOID:374     | nutrition disease         | 0,3474 | 0,0106 | 0,0192 |
| DOID:657     | adenoma                   | 0,3404 | 0,0106 | 0,0192 |
| DOID:688     | embryonal cancer          | 0,3305 | 0,0111 | 0,0198 |
| DOID:0080000 | muscular disease          | 0,3208 | 0,0122 | 0,0213 |

|              |                                   |        |        |        |
|--------------|-----------------------------------|--------|--------|--------|
| DOID:0060056 | hypersensitivity reaction disease | 0,3022 | 0,0131 | 0,0225 |
| DOID:423     | myopathy                          | 0,3184 | 0,0143 | 0,0235 |
| DOID:66      | muscle tissue disease             | 0,3184 | 0,0143 | 0,0235 |
| DOID:0060084 | cell type benign neoplasm         | 0,3137 | 0,0144 | 0,0235 |
| DOID:3118    | hepatobiliary disease             | 0,3078 | 0,0152 | 0,0243 |
| DOID:3093    | nervous system cancer             | 0,2898 | 0,0158 | 0,0248 |
| DOID:1612    | breast cancer                     | 0,2966 | 0,0162 | 0,0248 |
| DOID:5093    | thoracic cancer                   | 0,2966 | 0,0162 | 0,0248 |
| DOID:5679    | retinal disease                   | 0,3368 | 0,0170 | 0,0257 |
| DOID:3459    | breast carcinoma                  | 0,3163 | 0,0191 | 0,0284 |
| DOID:0050739 | autosomal genetic disease         | 0,2842 | 0,0197 | 0,0287 |
| DOID:74      | hematopoietic system disease      | 0,3171 | 0,0199 | 0,0287 |
| DOID:1579    | respiratory system disease        | 0,3167 | 0,0217 | 0,0308 |

|              |                                         |        |        |        |
|--------------|-----------------------------------------|--------|--------|--------|
| DOID:850     | lung disease                            | 0,3147 | 0,0230 | 0,0322 |
| DOID:0060037 | developmental disorder of mental health | 0,2930 | 0,0235 | 0,0325 |
| DOID:120     | female reproductive organ cancer        | 0,3029 | 0,0290 | 0,0395 |
| DOID:409     | liver disease                           | 0,2995 | 0,0309 | 0,0415 |
| DOID:4766    | embryoma                                | 0,3187 | 0,0345 | 0,0457 |

**Table S5.2.** Enriched DO terms in genes co-expressed with DDAH1 in the dorsolateral prefrontal cortex of schizophrenic patients.

| ID           | Description               | Enrichment score | p-value | p.adjust |
|--------------|---------------------------|------------------|---------|----------|
| DOID:0050155 | sensory system disease    | 0.2820           | 0.0004  | 0.025    |
| DOID:848     | arthritis                 | 0.27             | 0.0006  | 0.025    |
| DOID:114     | heart disease             | 0.2813           | 0.0007  | 0.025    |
| DOID:3342    | bone inflammation disease | 0.2603           | 0.0008  | 0.025    |
| DOID:10763   | hypertension              | 0.2752           | 0.0012  | 0.0293   |

**Table S5.3.** Enriched DO terms in genes co-expressed with DDAH2 in the dorsolateral prefrontal cortex of non-psychiatric control subjects.

| ID           | Description                       | Enrichment score | p-value  | p.adjust |
|--------------|-----------------------------------|------------------|----------|----------|
| DOID:0050013 | carbohydrate metabolism disease   | 0,4882           | < 0.0001 | < 0.0001 |
| DOID:0050155 | sensory system disease            | 0,4803           | < 0.0001 | < 0.0001 |
| DOID:0050161 | lower respiratory tract disease   | 0,5993           | < 0.0001 | < 0.0001 |
| DOID:0050177 | monogenic disease                 | 0,4033           | < 0.0001 | < 0.0001 |
| DOID:0050615 | respiratory system cancer         | 0,4825           | < 0.0001 | < 0.0001 |
| DOID:0050737 | autosomal recessive disease       | 0,4767           | < 0.0001 | < 0.0001 |
| DOID:0050739 | autosomal genetic disease         | 0,3999           | < 0.0001 | < 0.0001 |
| DOID:0060056 | hypersensitivity reaction disease | 0,5306           | < 0.0001 | < 0.0001 |
| DOID:0060072 | benign neoplasm                   | 0,4666           | < 0.0001 | < 0.0001 |
| DOID:0060084 | cell type benign neoplasm         | 0,4626           | < 0.0001 | < 0.0001 |
| DOID:0060100 | musculoskeletal system cancer     | 0,5322           | < 0.0001 | < 0.0001 |
| DOID:0070004 | myeloma                           | 0,5692           | < 0.0001 | < 0.0001 |
| DOID:0080000 | muscular disease                  | 0,4405           | < 0.0001 | < 0.0001 |



|            |                                    |        |          |          |
|------------|------------------------------------|--------|----------|----------|
| DOID:10155 | intestinal cancer                  | 0,4995 | < 0.0001 | < 0.0001 |
| DOID:10283 | prostate cancer                    | 0,4838 | < 0.0001 | < 0.0001 |
| DOID:1037  | lymphoblastic leukemia             | 0,4687 | < 0.0001 | < 0.0001 |
| DOID:104   | bacterial infectious disease       | 0,6172 | < 0.0001 | < 0.0001 |
| DOID:1040  | chronic lymphocytic leukemia       | 0,5569 | < 0.0001 | < 0.0001 |
| DOID:10534 | stomach cancer                     | 0,5276 | < 0.0001 | < 0.0001 |
| DOID:10591 | pre-eclampsia                      | 0,5506 | < 0.0001 | < 0.0001 |
| DOID:10763 | hypertension                       | 0,4986 | < 0.0001 | < 0.0001 |
| DOID:1115  | sarcoma                            | 0,5668 | < 0.0001 | < 0.0001 |
| DOID:114   | heart disease                      | 0,5011 | < 0.0001 | < 0.0001 |
| DOID:1192  | peripheral nervous system neoplasm | 0,4383 | < 0.0001 | < 0.0001 |
| DOID:120   | female reproductive organ cancer   | 0,5136 | < 0.0001 | < 0.0001 |
| DOID:1324  | lung cancer                        | 0,4882 | < 0.0001 | < 0.0001 |
| DOID:1492  | eye and adnexa disease             | 0,4754 | < 0.0001 | < 0.0001 |
| DOID:15    | reproductive system disease        | 0,5538 | < 0.0001 | < 0.0001 |

|           |                              |        |          |          |
|-----------|------------------------------|--------|----------|----------|
| DOID:1579 | respiratory system disease   | 0,5926 | < 0.0001 | < 0.0001 |
| DOID:16   | integumentary system disease | 0,5534 | < 0.0001 | < 0.0001 |
| DOID:1612 | breast cancer                | 0,4884 | < 0.0001 | < 0.0001 |
| DOID:170  | endocrine gland cancer       | 0,4853 | < 0.0001 | < 0.0001 |
| DOID:1749 | squamous cell carcinoma      | 0,5138 | < 0.0001 | < 0.0001 |
| DOID:1781 | thyroid cancer               | 0,4945 | < 0.0001 | < 0.0001 |
| DOID:1793 | pancreatic cancer            | 0,4968 | < 0.0001 | < 0.0001 |
| DOID:18   | urinary system disease       | 0,5790 | < 0.0001 | < 0.0001 |
| DOID:184  | bone cancer                  | 0,5436 | < 0.0001 | < 0.0001 |
| DOID:1883 | hepatitis C                  | 0,5243 | < 0.0001 | < 0.0001 |
| DOID:1909 | melanoma                     | 0,4770 | < 0.0001 | < 0.0001 |
| DOID:193  | reproductive organ cancer    | 0,4785 | < 0.0001 | < 0.0001 |
| DOID:1936 | atherosclerosis              | 0,6308 | < 0.0001 | < 0.0001 |

|           |                                         |        |          |          |
|-----------|-----------------------------------------|--------|----------|----------|
| DOID:201  | connective tissue cancer                | 0,5436 | < 0.0001 | < 0.0001 |
| DOID:2043 | hepatitis B                             | 0,5957 | < 0.0001 | < 0.0001 |
| DOID:2151 | malignant ovarian surface               | 0,5384 | < 0.0001 | < 0.0001 |
| DOID:2152 | ovary epithelial cancer                 | 0,5384 | < 0.0001 | < 0.0001 |
| DOID:219  | colon cancer                            | 0,5029 | < 0.0001 | < 0.0001 |
| DOID:2237 | hepatitis                               | 0,5233 | < 0.0001 | < 0.0001 |
| DOID:2320 | obstructive lung disease                | 0,6380 | < 0.0001 | < 0.0001 |
| DOID:2348 | arteriosclerotic cardiovascular disease | 0,6327 | < 0.0001 | < 0.0001 |
| DOID:2349 | arteriosclerosis                        | 0,6269 | < 0.0001 | < 0.0001 |
| DOID:2355 | anemia                                  | 0,5573 | < 0.0001 | < 0.0001 |
| DOID:2394 | ovarian cancer                          | 0,5250 | < 0.0001 | < 0.0001 |
| DOID:263  | kidney cancer                           | 0,5206 | < 0.0001 | < 0.0001 |
| DOID:28   | endocrine system disease                | 0,5002 | < 0.0001 | < 0.0001 |
| DOID:2994 | germ cell cancer                        | 0,4784 | < 0.0001 | < 0.0001 |
| DOID:3070 | malignant glioma                        | 0,5149 | < 0.0001 | < 0.0001 |
| DOID:3083 | chronic obstructive pulmonary disease   | 0,6477 | < 0.0001 | < 0.0001 |
| DOID:3093 | nervous system cancer                   | 0,4255 | < 0.0001 | < 0.0001 |

|           |                                |        |          |          |
|-----------|--------------------------------|--------|----------|----------|
| DOID:3118 | hepatobiliary disease          | 0,5262 | < 0.0001 | < 0.0001 |
| DOID:3342 | bone inflammation disease      | 0,5541 | < 0.0001 | < 0.0001 |
| DOID:3347 | osteosarcoma                   | 0,5267 | < 0.0001 | < 0.0001 |
| DOID:3393 | coronary artery disease        | 0,5434 | < 0.0001 | < 0.0001 |
| DOID:3459 | breast carcinoma               | 0,5127 | < 0.0001 | < 0.0001 |
| DOID:37   | skin disease                   | 0,5787 | < 0.0001 | < 0.0001 |
| DOID:374  | nutrition disease              | 0,4935 | < 0.0001 | < 0.0001 |
| DOID:3856 | male reproductive organ cancer | 0,4767 | < 0.0001 | < 0.0001 |
| DOID:3905 | lung carcinoma                 | 0,5060 | < 0.0001 | < 0.0001 |
| DOID:3908 | non-small cell lung carcinoma  | 0,5061 | < 0.0001 | < 0.0001 |
| DOID:3996 | urinary system cancer          | 0,5172 | < 0.0001 | < 0.0001 |

|           |                                           |        |          |          |
|-----------|-------------------------------------------|--------|----------|----------|
| DOID:4001 | ovarian carcinoma                         | 0,5384 | < 0.0001 | < 0.0001 |
| DOID:409  | liver disease                             | 0,5163 | < 0.0001 | < 0.0001 |
| DOID:417  | hypersensitivity reaction type II disease | 0,5370 | < 0.0001 | < 0.0001 |
| DOID:4194 | glucose metabolism disease                | 0,4882 | < 0.0001 | < 0.0001 |
| DOID:423  | myopathy                                  | 0,4338 | < 0.0001 | < 0.0001 |
| DOID:4450 | renal cell carcinoma                      | 0,5156 | < 0.0001 | < 0.0001 |
| DOID:4451 | renal carcinoma                           | 0,5284 | < 0.0001 | < 0.0001 |
| DOID:4766 | embryoma                                  | 0,4867 | < 0.0001 | < 0.0001 |
| DOID:4905 | pancreatic carcinoma                      | 0,4984 | < 0.0001 | < 0.0001 |
| DOID:4960 | bone marrow cancer                        | 0,5642 | < 0.0001 | < 0.0001 |
| DOID:5093 | thoracic cancer                           | 0,4884 | < 0.0001 | < 0.0001 |
| DOID:557  | kidney disease                            | 0,5822 | < 0.0001 | < 0.0001 |
| DOID:5614 | eye disease                               | 0,4726 | < 0.0001 | < 0.0001 |
| DOID:5672 | large intestine cancer                    | 0,5068 | < 0.0001 | < 0.0001 |
| DOID:5679 | retinal disease                           | 0,4495 | < 0.0001 | < 0.0001 |
| DOID:5844 | myocardial infarction                     | 0,5560 | < 0.0001 | < 0.0001 |
| DOID:654  | overnutrition                             | 0,4977 | < 0.0001 | < 0.0001 |
| DOID:66   | muscle tissue disease                     | 0,4338 | < 0.0001 | < 0.0001 |
| DOID:688  | embryonal cancer                          | 0,4775 | < 0.0001 | < 0.0001 |

|           |                              |        |          |          |
|-----------|------------------------------|--------|----------|----------|
| DOID:7148 | rheumatoid arthritis         | 0,5733 | < 0.0001 | < 0.0001 |
| DOID:74   | hematopoietic system disease | 0,5511 | < 0.0001 | < 0.0001 |
| DOID:848  | arthritis                    | 0,5561 | < 0.0001 | < 0.0001 |
| DOID:850  | lung disease                 | 0,6045 | < 0.0001 | < 0.0001 |
| DOID:854  | collagen disease             | 0,5533 | < 0.0001 | < 0.0001 |
| DOID:9256 | colorectal cancer            | 0,5072 | < 0.0001 | < 0.0001 |
| DOID:934  | viral infectious disease     | 0,4839 | < 0.0001 | < 0.0001 |
| DOID:9351 | diabetes mellitus            | 0,4851 | < 0.0001 | < 0.0001 |
| DOID:9538 | multiple myeloma             | 0,5662 | < 0.0001 | < 0.0001 |

|              |                                   |        |          |          |
|--------------|-----------------------------------|--------|----------|----------|
| DOID:9970    | obesity                           | 0,4912 | < 0.0001 | < 0.0001 |
| DOID:2621    | autonomic nervous system neoplasm | 0,4267 | < 0.0001 | < 0.0001 |
| DOID:769     | neuroblastoma                     | 0,4267 | < 0.0001 | < 0.0001 |
| DOID:0060085 | organ system benign neoplasm      | 0,4870 | < 0.0001 | < 0.0001 |
| DOID:3963    | thyroid carcinoma                 | 0,4921 | < 0.0001 | < 0.0001 |
| DOID:1036    | chronic leukemia                  | 0,5168 | < 0.0001 | < 0.0001 |
| DOID:326     | ischemia                          | 0,4913 | < 0.0001 | < 0.0001 |
| DOID:11934   | head and neck cancer              | 0,4737 | < 0.0001 | < 0.0001 |
| DOID:657     | adenoma                           | 0,4537 | < 0.0001 | < 0.0001 |
| DOID:1542    | head and neck carcinoma           | 0,4656 | < 0.0001 | < 0.0001 |
| DOID:655     | inherited metabolic disorder      | 0,4288 | < 0.0001 | < 0.0001 |
| DOID:6000    | congestive heart failure          | 0,4998 | < 0.0001 | < 0.0001 |
| DOID:8466    | retinal degeneration              | 0,4556 | < 0.0001 | < 0.0001 |
| DOID:0050736 | autosomal dominant disease        | 0,3740 | < 0.0001 | < 0.0001 |
| DOID:10652   | Alzheimer's disease               | 0,3564 | < 0.0001 | < 0.0001 |
| DOID:680     | tauopathy                         | 0,3525 | < 0.0001 | < 0.0001 |
| DOID:870     | neuropathy                        | 0,4166 | < 0.0001 | < 0.0001 |
| DOID:231     | motor neuron disease              | 0,3724 | 0,0002   | 0,0002   |
| DOID:0050890 | synucleinopathy                   | 0,3642 | 0,0003   | 0,0003   |
| DOID:14330   | Parkinson's disease               | 0,3864 | 0,0004   | 0,0004   |
| DOID:936     | brain disease                     | 0,3021 | 0,0006   | 0,0006   |

|              |                                         |        |        |        |
|--------------|-----------------------------------------|--------|--------|--------|
| DOID:332     | amyotrophic lateral sclerosis           | 0,3729 | 0,0009 | 0,0009 |
| DOID:0060037 | developmental disorder of mental health | 0,3106 | 0,0009 | 0,0010 |
| DOID:0060040 | pervasive developmental disorder        | 0,3404 | 0,0015 | 0,0016 |
| DOID:5683    | hereditary breast ovarian cancer        | 0,3413 | 0,0022 | 0,0023 |
| DOID:0060041 | autism spectrum disorder                | 0,3112 | 0,0146 | 0,0152 |
| DOID:12849   | autistic disorder                       | 0,3112 | 0,0146 | 0,0152 |

**Table S5. 4.** Enriched DO terms in genes co-expressed with DDAH1 in the dorsolateral prefrontal cortex of bipolar disorder patients.

| ID           | Description                             | Enrichment score | p-value  | p.adjust |
|--------------|-----------------------------------------|------------------|----------|----------|
| DOID:0050013 | carbohydrate metabolism disease         | 0,3303           | < 0,0001 | < 0,0001 |
| DOID:0050161 | lower respiratory tract disease         | 0,3340           | < 0,0001 | < 0,0001 |
| DOID:0050615 | respiratory system cancer               | 0,2903           | < 0,0001 | < 0,0001 |
| DOID:0060056 | hypersensitivity reaction disease       | 0,3165           | < 0,0001 | < 0,0001 |
| DOID:10763   | hypertension                            | 0,3069           | < 0,0001 | < 0,0001 |
| DOID:114     | heart disease                           | 0,3231           | < 0,0001 | < 0,0001 |
| DOID:1579    | respiratory system disease              | 0,3452           | < 0,0001 | < 0,0001 |
| DOID:16      | integumentary system disease            | 0,3606           | < 0,0001 | < 0,0001 |
| DOID:18      | urinary system disease                  | 0,3380           | < 0,0001 | < 0,0001 |
| DOID:1936    | atherosclerosis                         | 0,3754           | < 0,0001 | < 0,0001 |
| DOID:2237    | hepatitis                               | 0,3267           | < 0,0001 | < 0,0001 |
| DOID:2348    | arteriosclerotic cardiovascular disease | 0,3754           | < 0,0001 | < 0,0001 |
| DOID:2349    | arteriosclerosis                        | 0,3859           | < 0,0001 | < 0,0001 |
| DOID:263     | kidney cancer                           | 0,3097           | < 0,0001 | < 0,0001 |
| DOID:3118    | hepatobiliary disease                   | 0,3375           | < 0,0001 | < 0,0001 |
| DOID:3342    | bone inflammation disease               | 0,3858           | < 0,0001 | < 0,0001 |
| DOID:3393    | coronary artery disease                 | 0,4062           | < 0,0001 | < 0,0001 |
| DOID:3905    | lung carcinoma                          | 0,3225           | < 0,0001 | < 0,0001 |
| DOID:3908    | non-small cell lung carcinoma           | 0,3334           | < 0,0001 | < 0,0001 |
| DOID:3996    | urinary system cancer                   | 0,3143           | < 0,0001 | < 0,0001 |
| DOID:409     | liver disease                           | 0,3328           | < 0,0001 | < 0,0001 |

|           |                                           |        |          |          |
|-----------|-------------------------------------------|--------|----------|----------|
| DOID:417  | hypersensitivity reaction type II disease | 0,3164 | < 0,0001 | < 0,0001 |
| DOID:4194 | glucose metabolism disease                | 0,3303 | < 0,0001 | < 0,0001 |
| DOID:557  | kidney disease                            | 0,3437 | < 0,0001 | < 0,0001 |
| DOID:655  | inherited metabolic disorder              | 0,3719 | < 0,0001 | < 0,0001 |
| DOID:7148 | rheumatoid arthritis                      | 0,3660 | < 0,0001 | < 0,0001 |

|              |                                      |        |          |          |
|--------------|--------------------------------------|--------|----------|----------|
| DOID:74      | hematopoietic system disease         | 0,3379 | < 0,0001 | < 0,0001 |
| DOID:848     | arthritis                            | 0,3790 | < 0,0001 | < 0,0001 |
| DOID:850     | lung disease                         | 0,3353 | < 0,0001 | < 0,0001 |
| DOID:9351    | diabetes mellitus                    | 0,3239 | < 0,0001 | < 0,0001 |
| DOID:1324    | lung cancer                          | 0,2931 | < 0,0001 | < 0,0001 |
| DOID:5844    | myocardial infarction                | 0,3916 | < 0,0001 | < 0,0001 |
| DOID:4450    | renal cell carcinoma                 | 0,3342 | < 0,0001 | < 0,0001 |
| DOID:37      | skin disease                         | 0,3718 | < 0,0001 | < 0,0001 |
| DOID:28      | endocrine system disease             | 0,3421 | < 0,0001 | < 0,0001 |
| DOID:0070004 | myeloma                              | 0,3478 | < 0,0001 | < 0,0001 |
| DOID:104     | bacterial infectious disease         | 0,4058 | < 0,0001 | < 0,0001 |
| DOID:934     | viral infectious disease             | 0,2651 | < 0,0001 | < 0,0001 |
| DOID:4960    | bone marrow cancer                   | 0,3468 | < 0,0001 | < 0,0001 |
| DOID:4451    | renal carcinoma                      | 0,3134 | < 0,0001 | < 0,0001 |
| DOID:0050338 | primary bacterial infectious disease | 0,4176 | < 0,0001 | < 0,0001 |
| DOID:5614    | eye disease                          | 0,2886 | < 0,0001 | < 0,0001 |
| DOID:0050155 | sensory system disease               | 0,2821 | < 0,0001 | < 0,0001 |
| DOID:0060072 | benign neoplasm                      | 0,2704 | < 0,0001 | < 0,0001 |
| DOID:1115    | sarcoma                              | 0,3747 | < 0,0001 | < 0,0001 |
| DOID:2994    | germ cell cancer                     | 0,2957 | < 0,0001 | < 0,0001 |
| DOID:1520    | colon carcinoma                      | 0,3965 | < 0,0001 | < 0,0001 |
| DOID:1037    | lymphoblastic leukemia               | 0,2980 | < 0,0001 | < 0,0001 |
| DOID:170     | endocrine gland cancer               | 0,2715 | < 0,0001 | < 0,0001 |
| DOID:1492    | eye and adnexa disease               | 0,2815 | < 0,0001 | < 0,0001 |
| DOID:688     | embryonal cancer                     | 0,3055 | < 0,0001 | < 0,0001 |

|            |                   |        |          |          |
|------------|-------------------|--------|----------|----------|
| DOID:10591 | pre-eclampsia     | 0,3647 | < 0,0001 | < 0,0001 |
| DOID:8398  | osteoarthritis    | 0,3879 | < 0,0001 | < 0,0001 |
| DOID:1793  | pancreatic cancer | 0,3152 | < 0,0001 | < 0,0001 |

|              |                                |        |          |          |
|--------------|--------------------------------|--------|----------|----------|
| DOID:1883    | hepatitis C                    | 0,3522 | < 0,0001 | < 0,0001 |
| DOID:0060100 | musculoskeletal system cancer  | 0,2724 | < 0,0001 | < 0,0001 |
| DOID:2355    | anemia                         | 0,3517 | < 0,0001 | < 0,0001 |
| DOID:0060084 | cell type benign neoplasm      | 0,2761 | < 0,0001 | < 0,0001 |
| DOID:4766    | embryoma                       | 0,2988 | < 0,0001 | < 0,0001 |
| DOID:10155   | intestinal cancer              | 0,3050 | < 0,0001 | < 0,0001 |
| DOID:1040    | chronic lymphocytic leukemia   | 0,3692 | < 0,0001 | < 0,0001 |
| DOID:3910    | lung adenocarcinoma            | 0,3745 | < 0,0001 | < 0,0001 |
| DOID:9256    | colorectal cancer              | 0,3048 | < 0,0001 | < 0,0001 |
| DOID:5672    | large intestine cancer         | 0,3035 | < 0,0001 | < 0,0001 |
| DOID:5082    | liver cirrhosis                | 0,3558 | < 0,0001 | < 0,0001 |
| DOID:6000    | congestive heart failure       | 0,3341 | < 0,0001 | < 0,0001 |
| DOID:201     | connective tissue cancer       | 0,2709 | < 0,0001 | < 0,0001 |
| DOID:9352    | type 2 diabetes mellitus       | 0,3543 | < 0,0001 | < 0,0001 |
| DOID:0080000 | muscular disease               | 0,2657 | < 0,0001 | < 0,0001 |
| DOID:3856    | male reproductive organ cancer | 0,2558 | < 0,0001 | < 0,0001 |
| DOID:219     | colon cancer                   | 0,2944 | < 0,0001 | < 0,0001 |
| DOID:423     | myopathy                       | 0,2683 | < 0,0001 | < 0,0001 |
| DOID:66      | muscle tissue disease          | 0,2683 | < 0,0001 | < 0,0001 |
| DOID:1542    | head and neck carcinoma        | 0,3110 | < 0,0001 | < 0,0001 |
| DOID:10283   | prostate cancer                | 0,2610 | < 0,0001 | < 0,0001 |
| DOID:11934   | head and neck cancer           | 0,3039 | < 0,0001 | < 0,0001 |
| DOID:9970    | obesity                        | 0,2932 | < 0,0001 | < 0,0001 |
| DOID:654     | overnutrition                  | 0,2886 | < 0,0001 | < 0,0001 |
| DOID:5679    | retinal disease                | 0,2789 | < 0,0001 | < 0,0001 |
| DOID:9538    | multiple myeloma               | 0,2975 | < 0,0001 | < 0,0001 |
| DOID:10534   | stomach cancer                 | 0,3012 | < 0,0001 | < 0,0001 |

|          |                                  |        |          |          |
|----------|----------------------------------|--------|----------|----------|
| DOID:120 | female reproductive organ cancer | 0,2531 | < 0,0001 | < 0,0001 |
|----------|----------------------------------|--------|----------|----------|

|              |                                       |         |          |          |
|--------------|---------------------------------------|---------|----------|----------|
| DOID:1612    | breast cancer                         | 0,2396  | < 0,0001 | < 0,0001 |
| DOID:5093    | thoracic cancer                       | 0,2396  | < 0,0001 | < 0,0001 |
| DOID:374     | nutrition disease                     | 0,2789  | < 0,0001 | < 0,0001 |
| DOID:612     | primary immunodeficiency disease      | 0,3364  | < 0,0001 | < 0,0001 |
| DOID:2320    | obstructive lung disease              | 0,2979  | < 0,0001 | < 0,0001 |
| DOID:0060085 | organ system benign neoplasm          | 0,2940  | < 0,0001 | < 0,0001 |
| DOID:4905    | pancreatic carcinoma                  | 0,3033  | < 0,0001 | < 0,0001 |
| DOID:870     | neuropathy                            | 0,3233  | < 0,0001 | < 0,0001 |
| DOID:2043    | hepatitis B                           | 0,3240  | < 0,0001 | < 0,0001 |
| DOID:2151    | malignant ovarian surface             | 0,2777  | < 0,0001 | < 0,0001 |
| DOID:2152    | ovary epithelial cancer               | 0,2777  | < 0,0001 | < 0,0001 |
| DOID:4001    | ovarian carcinoma                     | 0,2777  | < 0,0001 | < 0,0001 |
| DOID:15      | reproductive system disease           | 0,2736  | < 0,0001 | < 0,0001 |
| DOID:657     | adenoma                               | 0,2674  | < 0,0001 | 0,0001   |
| DOID:5520    | head and neck squamous cell carcinoma | 0,3104  | < 0,0001 | 0,0001   |
| DOID:1036    | chronic leukemia                      | 0,3020  | 0,0001   | 0,0001   |
| DOID:184     | bone cancer                           | 0,2694  | 0,0001   | < 0,0001 |
| DOID:10652   | Alzheimer's disease                   | 0,2302  | 0,0001   | 0,0002   |
| DOID:3070    | malignant glioma                      | 0,2835  | 0,0001   | 0,0002   |
| DOID:3083    | chronic obstructive pulmonary disease | 0,3078  | 0,0001   | 0,0002   |
| DOID:8466    | retinal degeneration                  | 0,2740  | 0,0002   | 0,0002   |
| DOID:680     | tauopathy                             | 0,2243  | 0,0002   | 0,0003   |
| DOID:3459    | breast carcinoma                      | 0,2422  | 0,0002   | 0,0003   |
| DOID:2394    | ovarian cancer                        | 0,2510  | 0,0007   | 0,0009   |
| DOID:326     | ischemia                              | 0,2519  | 0,0034   | 0,0043   |
| DOID:0050737 | autosomal recessive disease           | 0,2300  | 0,0039   | 0,0049   |
| DOID:3347    | osteosarcoma                          | 0,2464  | 0,0041   | 0,0051   |
| DOID:1826    | epilepsy syndrome                     | -0,3043 | 0,0073   | 0,0090   |
| DOID:3093    | nervous system cancer                 | 0,1812  | 0,0125   | 0,0149   |



|              |                            |        |        |        |
|--------------|----------------------------|--------|--------|--------|
| DOID:1575    | rheumatic disease          | 0,2511 | 0,0126 | 0,0149 |
| DOID:418     | systemic scleroderma       | 0,2511 | 0,0126 | 0,0149 |
| DOID:419     | scleroderma                | 0,2511 | 0,0126 | 0,0149 |
| DOID:854     | collagen disease           | 0,2442 | 0,0145 | 0,0170 |
| DOID:936     | brain disease              | 0,1888 | 0,0297 | 0,0345 |
| DOID:0050736 | autosomal dominant disease | 0,1882 | 0,0379 | 0,0437 |

**Table S5.5.** Enriched DO terms in genes co-expressed with DDAH2 in the dorsolateral prefrontal cortex of schizophrenic patients.

| ID           | Description                             | Enrichment score | p-value | p.adjust |
|--------------|-----------------------------------------|------------------|---------|----------|
| DOID:1115    | sarcoma                                 | 0,3488           | 0,0001  | 0,0111   |
| DOID:0050155 | sensory system disease                  | 0,2625           | 0,0004  | 0,0245   |
| DOID:0050161 | lower respiratory tract disease         | 0,2624           | 0,0016  | 0,0429   |
| DOID:10763   | hypertension                            | 0,2494           | 0,0022  | 0,0429   |
| DOID:850     | lung disease                            | 0,2640           | 0,0023  | 0,0429   |
| DOID:5614    | eye disease                             | 0,2543           | 0,0025  | 0,0429   |
| DOID:1579    | respiratory system disease              | 0,2582           | 0,0027  | 0,0429   |
| DOID:3393    | coronary artery disease                 | 0,2908           | 0,0027  | 0,0429   |
| DOID:10591   | pre-eclampsia                           | 0,3001           | 0,0038  | 0,0470   |
| DOID:5683    | hereditary breast ovarian cancer        | 0,2947           | 0,0038  | 0,0470   |
| DOID:18      | urinary system disease                  | 0,2484           | 0,0055  | 0,0476   |
| DOID:557     | kidney disease                          | 0,2511           | 0,0056  | 0,0476   |
| DOID:5844    | myocardial infarction                   | 0,3002           | 0,0057  | 0,0476   |
| DOID:2348    | arteriosclerotic cardiovascular disease | 0,2671           | 0,0058  | 0,0476   |
| DOID:1492    | eye and adnexa disease                  | 0,2514           | 0,0059  | 0,0476   |
| DOID:2349    | arteriosclerosis                        | 0,2738           | 0,0062  | 0,0476   |
| DOID:5679    | retinal disease                         | 0,2660           | 0,0065  | 0,0476   |
